# Supplementary material
Source: PubMed Central journal article supplement (PMC1326414)
Supplement: 4-7400019-s1.pdf [file 4-7400019-s1.pdf]

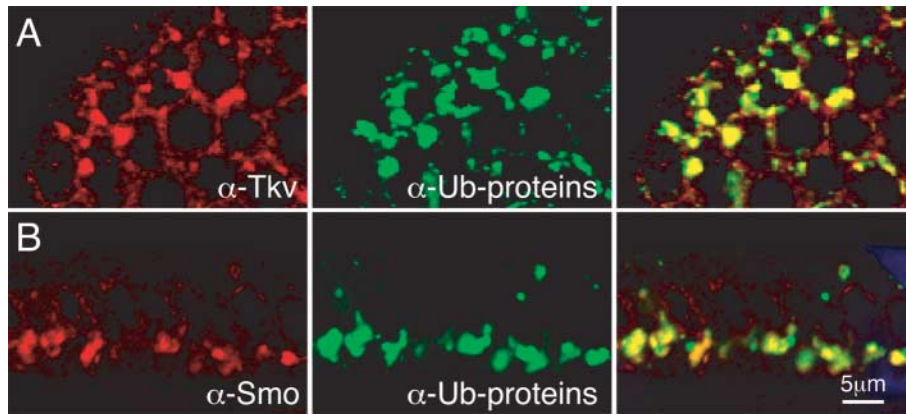

Supplementary Figure 1.

**Co-localisation of Smoothened and thick veins with ubiquitinated proteins in *hrs* mutant cells.** Patches of *hrs* mutant follicle cells stained with antibodies against Tkv (**A**) and Smo (**B**) (red) and an antibody against ubiquitinated proteins (green). All cells shown in these magnified views are mutant. The overlap between the signals is yellow in the merged images (right) and shows the intracellular accumulations. The section in A is in the plane of the epithelium. Note that the weaker, cortical Tkv signal does not overlap with the ubiquitinated protein signal. The section in B is perpendicular to the plane of the epithelium showing an enrichment of the ubiquitinated protein accumulations in the apical part of the cell.
